# Supplementary material for: Pervasive Selection for Clinically Relevant Resistance and Media Adaptive Mutations at Very Low Antibiotic Concentrations
Source: PubMed Central journal article supplement (PMC9887637; doi:10.1093/molbev/msad010), 2023-01-11
Supplement: msad010_supplementary_data.pdf [file msad010_supplementary_data.pdf]

**Supplementary Fig. 1.** Increase in frequency of resistant mutants with different levels of resistance in populations evolving at sub-MICs of antibiotics. A) Fosfomycin B) Tetracycline C) Nitrofurantoin and D) Ciprofloxacin. Different levels of resistance was determined by plating the evolving populations at different antibiotic concentrations, which are shown in different colors in the figures

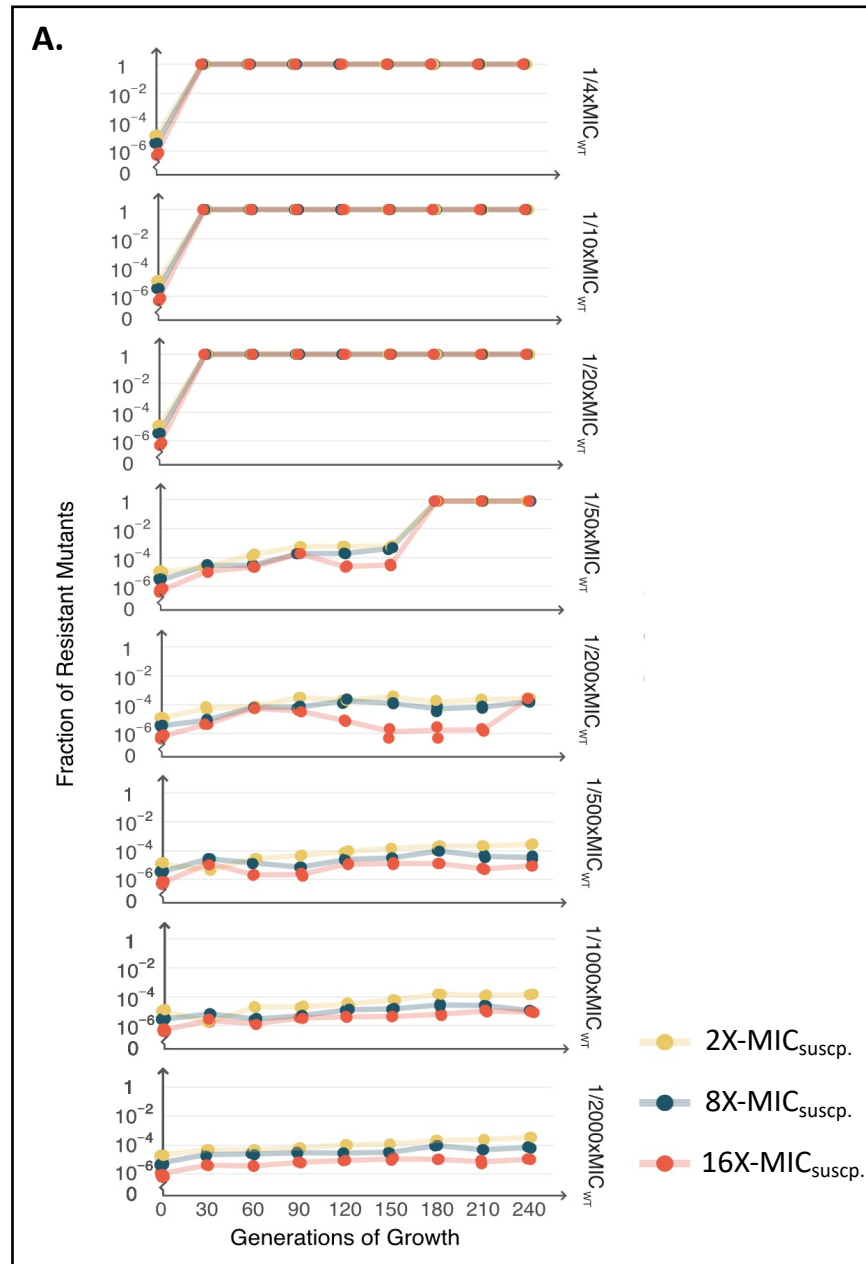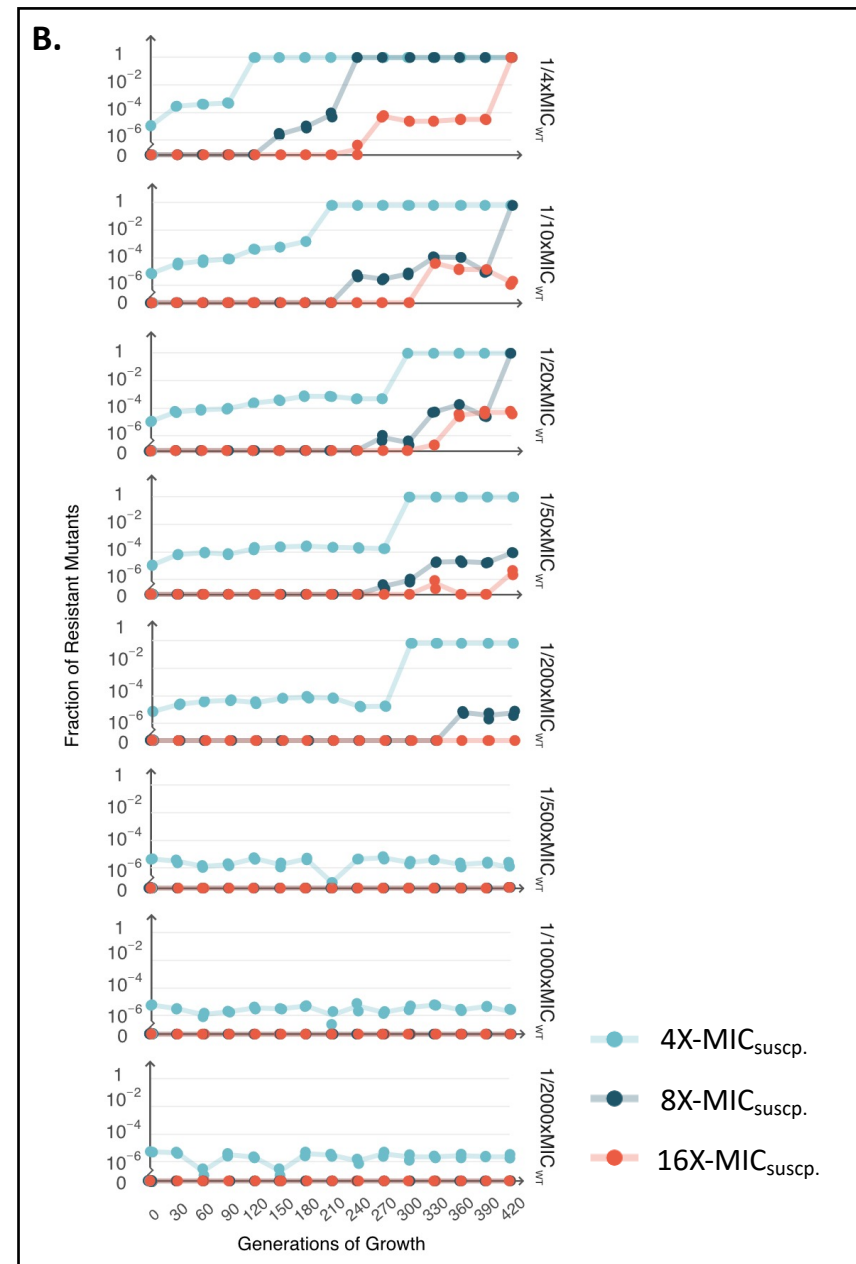

Supplementary Fig. 1.

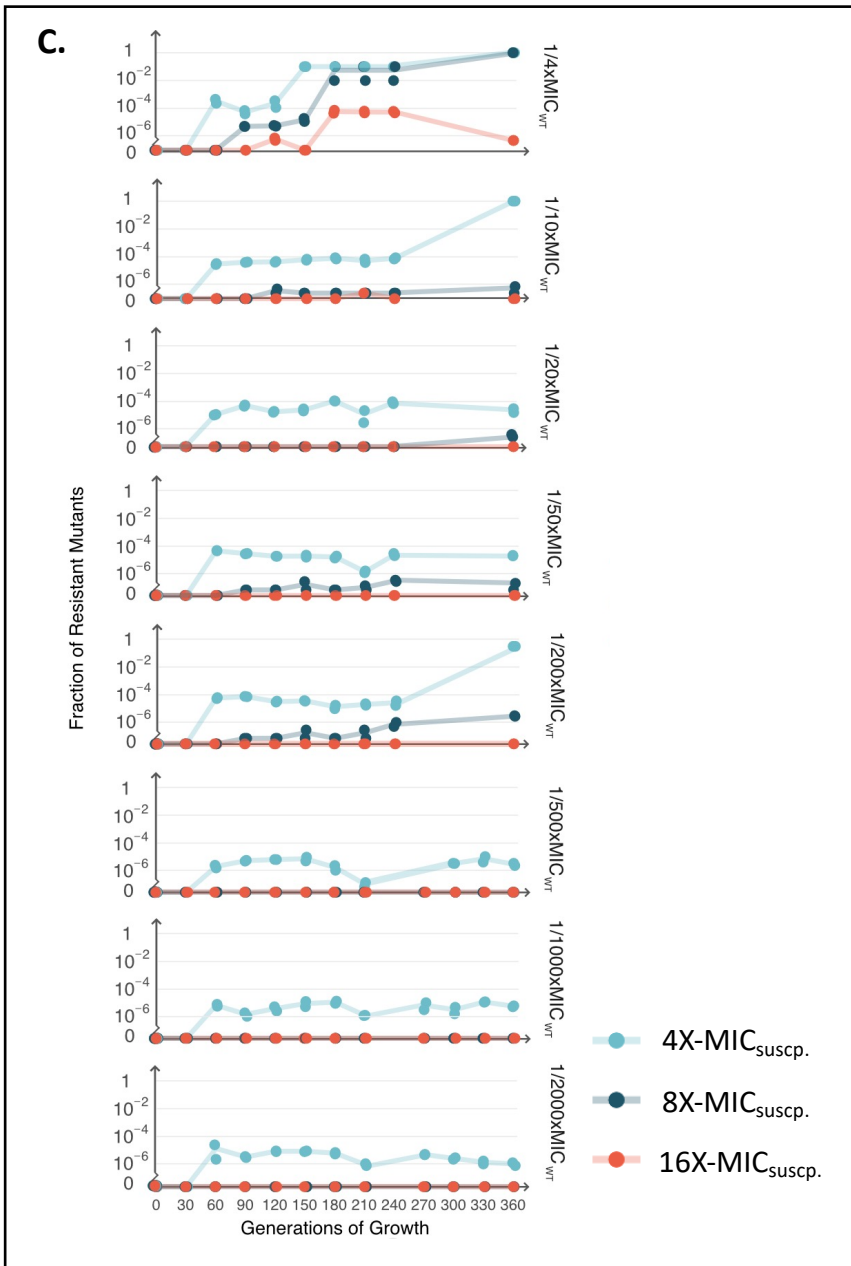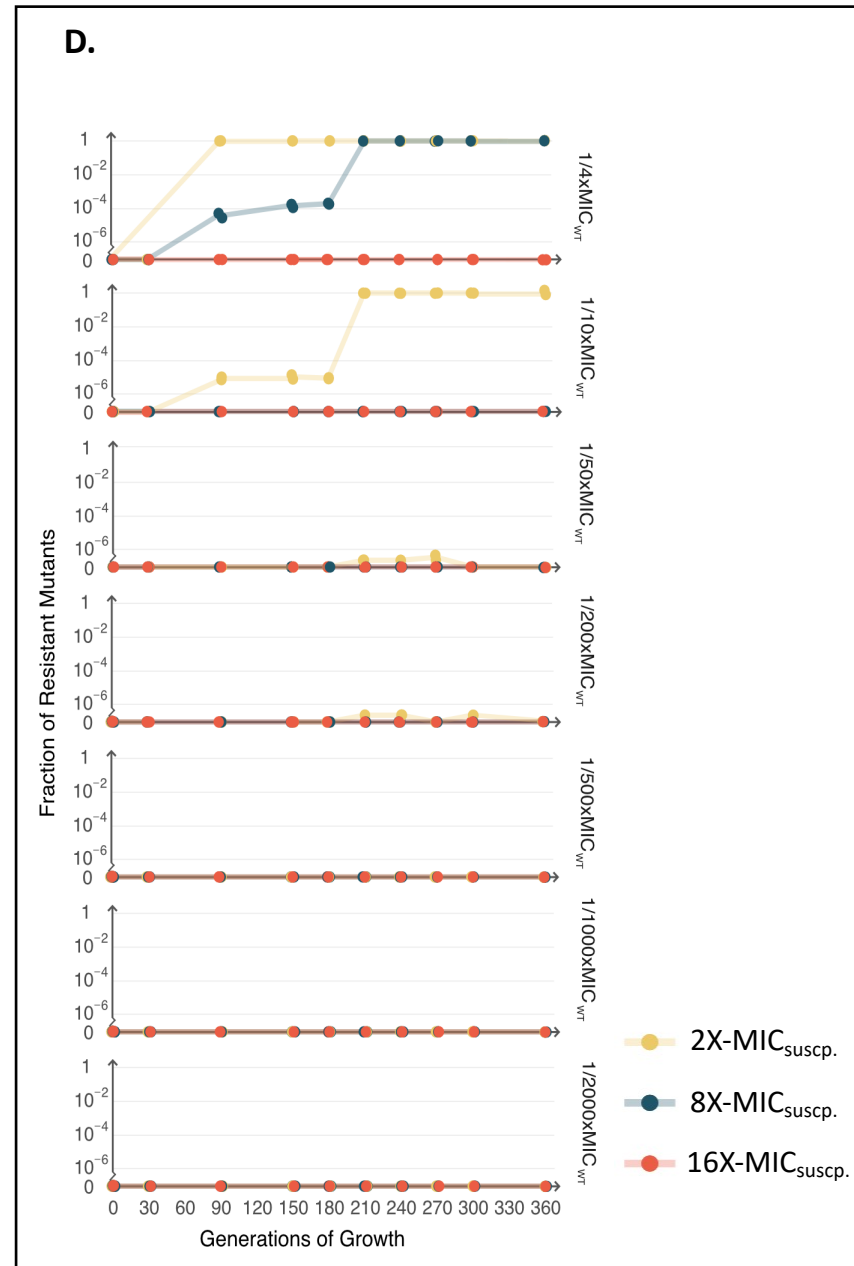

**Supplementary Fig. 2.** Exponential growth-rates at different antibiotic concentrations for resistant mutants isolated on A) Fosfomycin B) Tetracycline C) Nitrofurantoin and D) Ciprofloxacin

**A.**

Mutants isolated at 1/4<sup>th</sup> MIC<sub>susceptible</sub> of fosfomycin

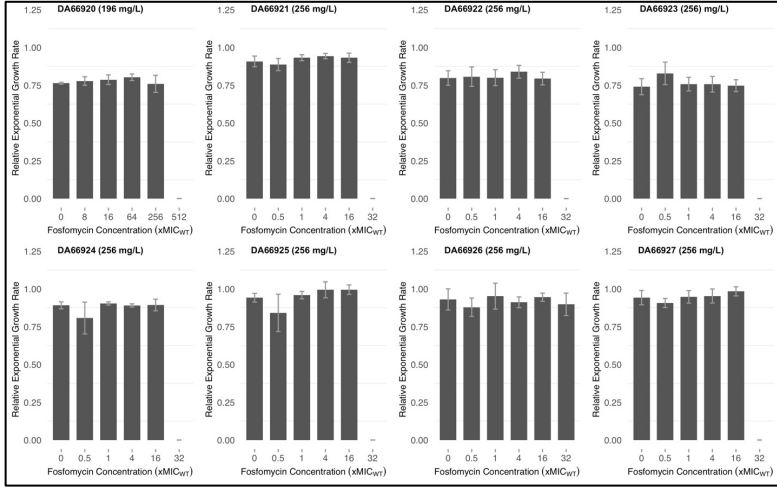

Mutants isolated at 1/200<sup>th</sup> MIC<sub>susceptible</sub> of fosfomycin

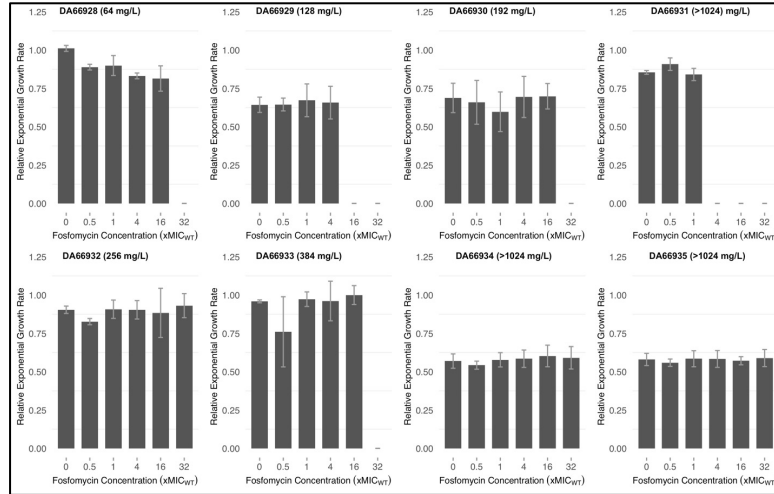

Mutants isolated at 1/2000<sup>th</sup> MIC<sub>susceptible</sub> of fosfomycin

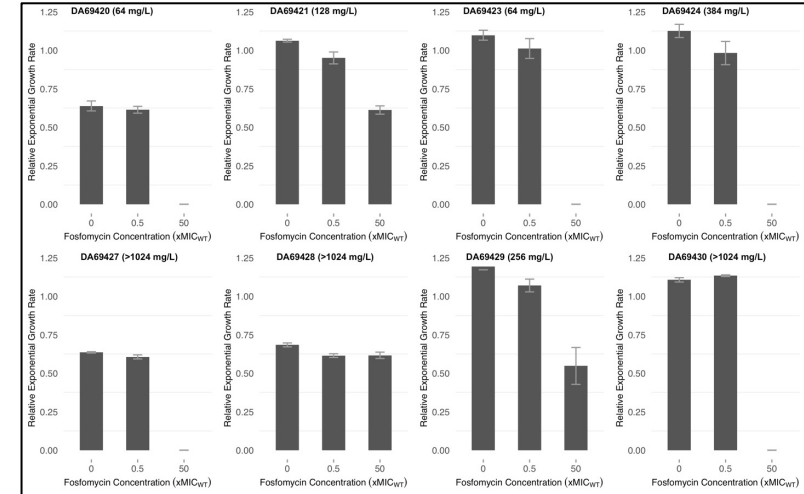

**B.**

Mutants isolated at 1/4<sup>th</sup> MIC<sub>susceptible</sub> of tetracycline

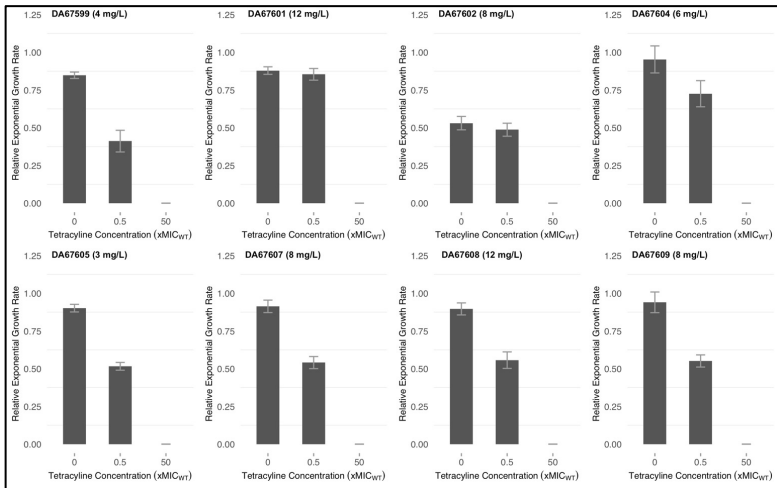

Mutants isolated at 1/200<sup>th</sup> MIC<sub>susceptible</sub> of tetracycline

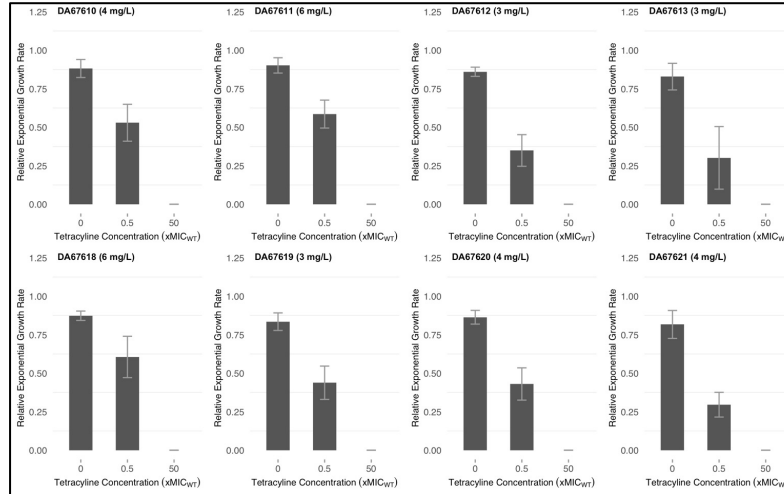

**Supplementary Fig. 2.** Exponential growth-rates at different antibiotic concentrations for resistant mutants isolated on A) Fosfomycin B) Tetracycline C) Nitrofurantoin and D) Ciprofloxacin

**C.** Mutants isolated at 1/4<sup>th</sup> MIC<sub>susceptible</sub> of nitrofurantoin

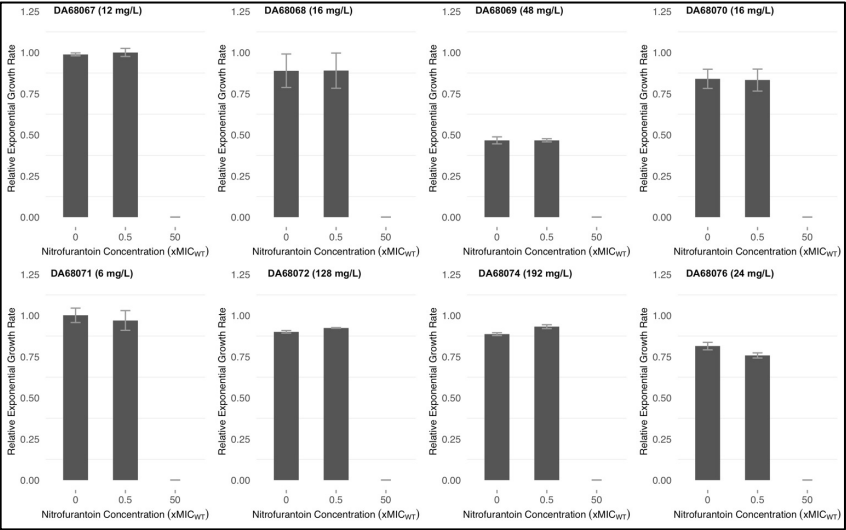

Mutants isolated at 1/200<sup>th</sup> MIC<sub>susceptible</sub> of nitrofurantoin

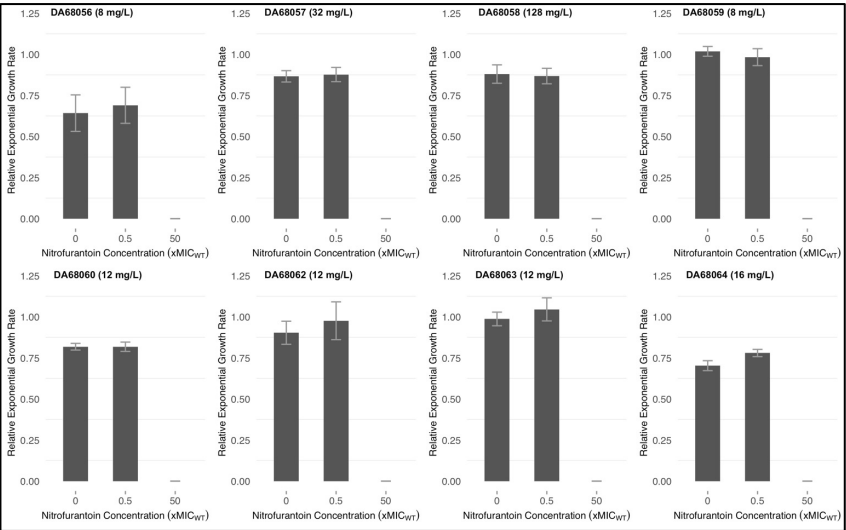

**D.** Mutants isolated at 1/4<sup>th</sup> MIC<sub>susceptible</sub> of ciprofloxacin

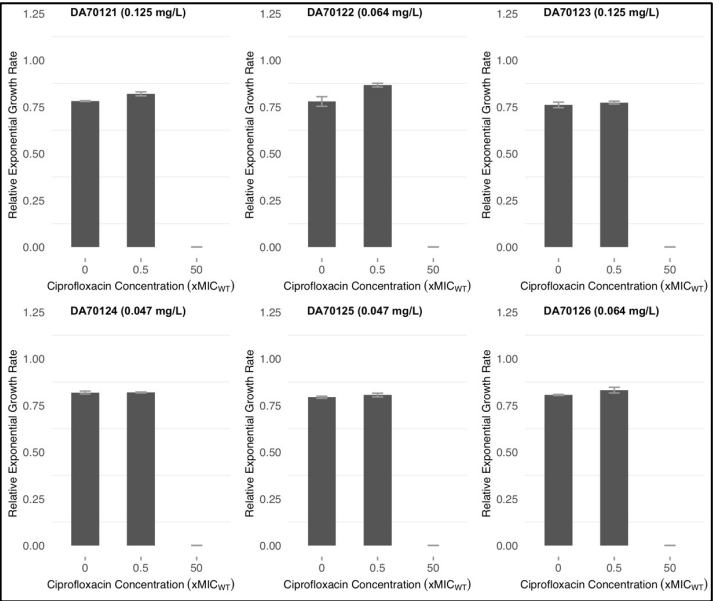

Mutants isolated at 1/10<sup>th</sup> MIC<sub>susceptible</sub> of ciprofloxacin

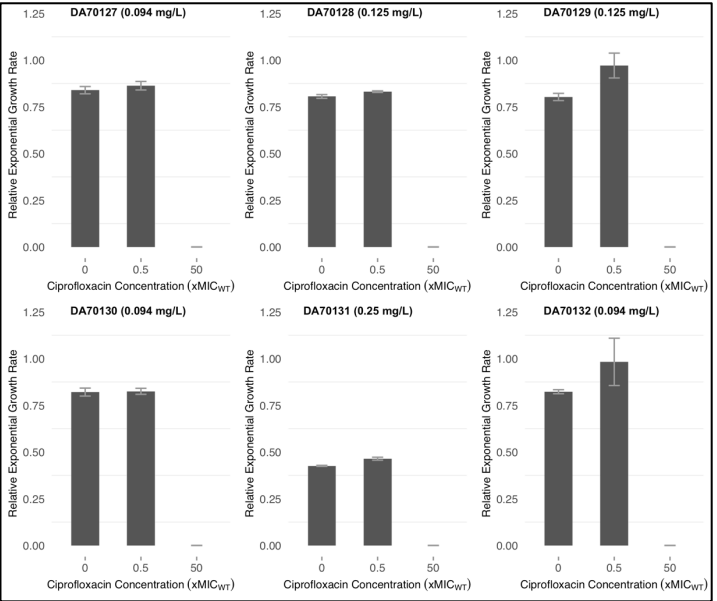



**Supplementary Fig. 3.** Mutations identified through whole-genome sequencing of resistant mutants isolated at the end-point of the experiment for populations evolving at sub-MICs of A) Fosfomycin B) Tetracycline C) Nitrofurantoin and D) Ciprofloxacin. Genes marked green are known resistance genes for the antibiotic on which selection was performed, those marked in yellow are known resistance genes but for other antibiotics and those marked red have been shown to confer media adaptation.

**B.**

|                 |                    | <i>envZ</i>        | <i>fbaA</i>       | <i>malT</i>       | <i>yahL</i>    | <i>gatY</i>    | <i>yeaR</i>      | <i>mdtF</i>        | <i>rho</i>       | <i>rpoC</i>                               | <i>fimE</i>    | <i>gatC</i>    | <i>elaD</i>    | <i>dhaK</i>       | <i>plsB</i>       | <i>trkA</i>       | <i>ptsP</i>        | <i>aat</i>         | <i>ymdA</i>        | <i>kdpD</i>       | <i>suhB</i>       | <i>mutL</i>       | <i>mutS</i>      | Intergenic insertions                     |                                           |
|-----------------|--------------------|--------------------|-------------------|-------------------|----------------|----------------|------------------|--------------------|------------------|-------------------------------------------|----------------|----------------|----------------|-------------------|-------------------|-------------------|--------------------|--------------------|--------------------|-------------------|-------------------|-------------------|------------------|-------------------------------------------|-------------------------------------------|
| Sel.: 1/4xMIC   | DA67599            | c.66C>A<br>L22F    | c.461T>C<br>N154S | c.658A>C<br>T220P | c.527::<br>IS5 | c.644::<br>IS5 | c.115::<br>IS186 | c.1402::<br>IS1    | c.259C>T<br>R87C |                                           |                |                |                |                   |                   |                   |                    |                    |                    |                   |                   |                   |                  | <i>malP</i> (460)/ <i>malT</i> (148)::IS5 |                                           |
|                 | DA67601            | c.40G>A<br>R14C    |                   |                   |                |                |                  |                    |                  | c.2176G>A<br>A726T<br>c.3149A>G<br>T1050A |                |                |                |                   |                   |                   |                    |                    |                    |                   |                   |                   |                  | c.653G>A<br>G218E<br>c.2444::IS1          |                                           |
|                 | DA67602            | c.40G>A<br>R14C    | c.704A>G<br>V235A |                   |                |                |                  |                    |                  |                                           |                | c.501::<br>IS1 |                |                   |                   |                   |                    |                    |                    |                   |                   |                   |                  |                                           | c.2444::IS1                               |
|                 | DA67604            | c.442G>A<br>P148S  |                   |                   |                |                |                  |                    |                  | c.250A>T<br>S84C                          |                | c.168::<br>IS1 |                |                   |                   |                   |                    |                    |                    |                   |                   |                   |                  |                                           |                                           |
|                 | DA67605            |                    |                   |                   |                |                |                  |                    |                  |                                           |                | c.272::<br>IS5 | c.85::<br>IS5  |                   |                   |                   |                    |                    |                    |                   |                   |                   |                  |                                           |                                           |
|                 | DA67607            |                    |                   |                   |                |                |                  |                    |                  |                                           |                |                |                | c.963C>A<br>A321= |                   |                   |                    |                    |                    |                   |                   |                   |                  |                                           |                                           |
|                 | DA67608            | c.1189G>A<br>R397C |                   |                   |                |                |                  |                    |                  |                                           |                | c.272::<br>IS5 | c.85::<br>IS5  |                   | c.858G>C<br>G268= | c.794C>A<br>R265L | c.1078A>C<br>S360R |                    |                    |                   |                   |                   |                  |                                           | <i>ompF</i> (220)/ <i>ansS</i> (-383):A>G |
| DA67609         | c.1189G>A<br>R397C |                    |                   |                   |                |                |                  |                    |                  |                                           | c.272::<br>IS5 | c.85::<br>IS5  |                |                   | c.794C>A<br>R265L |                   |                    |                    |                    |                   |                   |                   |                  |                                           |                                           |
| Sel.: 1/200xMIC | DA67610            | c.146A>G<br>V49A   |                   |                   |                |                |                  | c.2297T>C<br>V766A |                  |                                           | c.125::<br>IS5 | c.826::<br>IS5 |                |                   |                   |                   |                    | c.2002A>G<br>C668R | c.571T>C<br>N191D  | c.303::IS5        | c.823A>G<br>S275P |                   | c.275T>C<br>L92P |                                           |                                           |
|                 | DA67611            |                    |                   |                   |                |                |                  | c.1402::<br>IS1    |                  |                                           |                |                |                |                   |                   |                   |                    |                    |                    |                   | c.48delT          |                   |                  |                                           |                                           |
|                 | DA67612            |                    |                   |                   |                |                |                  |                    |                  |                                           | c.125::<br>IS5 | c.826::<br>IS5 |                |                   |                   |                   |                    | c.2002A>G<br>C668R |                    | c.309::IS5        |                   |                   | c.275T>C<br>L92P |                                           |                                           |
|                 | DA67613            |                    |                   |                   |                |                |                  | c.1402::<br>IS1    |                  |                                           |                |                |                |                   |                   |                   |                    |                    | c.1063A>G<br>S355P |                   | c.309::IS5        | c.986A>G<br>V329A |                  |                                           | c.1966C>A<br>R656S                        |
|                 | DA67618            |                    |                   |                   |                |                |                  |                    |                  |                                           | c.125::<br>IS5 |                |                |                   |                   |                   |                    |                    |                    |                   | c.309::IS5        |                   | c.699<br>G233=   |                                           |                                           |
|                 | DA67619            | c.146A>G<br>V49A   | c.551T>C<br>D184G |                   |                |                |                  |                    |                  |                                           |                | c.125::<br>IS5 | c.826::<br>IS5 |                   |                   |                   |                    |                    | c.2002A>G<br>C668R | c.571T>C<br>N191D | c.309::IS5        |                   |                  | c.275T>C<br>L92P                          |                                           |
|                 | DA67620            | c.146A>G<br>V49A   | c.551T>C<br>D184G |                   |                |                |                  |                    |                  |                                           |                | c.125::<br>IS5 | c.826::<br>IS5 |                   |                   |                   |                    |                    | c.2002A>G<br>C668R | c.571T>C<br>N191D | c.309::IS5        | c.823A>G<br>S275P |                  | c.275T>C<br>L92P                          |                                           |
|                 | DA67621            |                    |                   |                   |                |                |                  |                    |                  |                                           |                | c.125::<br>IS5 | c.826::<br>IS5 |                   |                   |                   |                    |                    |                    |                   |                   |                   |                  |                                           | c.275T>C<br>L92P                          |

Positions for mutations outside of coding sequences are given relative to the first nucleotide in the start codon of the downstream gene (negative numbers).

\* stop codon; Δ deletion; fs frame shift; del deletion; ins insertion; dup duplication; c. coding region

Genes mutated in our study that earlier have been described to confer resistance to tetracycline

Genes mutated in our study that earlier have been described as genetic adaptations to growth in laboratory conditions (Knöppel et al., 2018)

Genes mutated in our study that earlier have been described to confer antimicrobial resistance

Strains in our study that were found to be hypermutators

**Supplementary Fig. 3.** Mutations identified through whole-genome sequencing of resistant mutants isolated at the end-point of the experiment for populations evolving at sub-MICs of A) Fosfomycin B) Tetracycline C) Nitrofurantoin and D) Ciprofloxacin. Genes marked green are known resistance genes for the antibiotic on which selection was performed, those marked in yellow are known resistance genes but for other antibiotics and those marked red have been shown to confer media adaptation.

C.

|                 | <i>nfsA</i>  | <i>yeaR</i>        | <i>uhpT</i>  | <i>relA</i>                   | <i>yfaS</i>                   | <i>nfsB</i> | <i>ptwF</i> | <i>ycgB</i> | <i>menC</i> | <i>leuV</i> | <i>rpsK</i> | <i>fimE</i> | <i>kdpD</i> | <i>rph</i> | <i>mpaA</i> | <i>ydcl</i> | <i>yhaC</i> | <i>mutT</i> | <i>yfdE</i> | <i>cheA</i> | <i>ptsP</i> | <i>yobF</i> | <i>putP</i> | <i>aat</i> | <i>mdtH</i> | <i>degQ</i> | <i>rho</i> | Intergenic insertions | Deletions                       |                                                                                          |                          |
|-----------------|--------------|--------------------|--------------|-------------------------------|-------------------------------|-------------|-------------|-------------|-------------|-------------|-------------|-------------|-------------|------------|-------------|-------------|-------------|-------------|-------------|-------------|-------------|-------------|-------------|------------|-------------|-------------|------------|-----------------------|---------------------------------|------------------------------------------------------------------------------------------|--------------------------|
| Sel.: 1/4xMIC   | DA68067      | c.674::IS30        | c.115::IS186 | c.1003_1281del<br>Δ A335-G427 | c.2172_2184del<br>Δ A274-G727 |             |             |             |             |             |             |             |             |            |             |             |             |             |             |             |             |             |             |            |             |             |            |                       | <i>dut(-84)/slmA(23):T&gt;C</i> |                                                                                          |                          |
|                 | DA68068      | c.674::IS30        | c.115::IS186 | c.1003_1281del<br>Δ A335-G427 | c.2172_2184del<br>Δ A274-G727 |             |             |             |             |             |             |             |             |            |             |             |             |             |             |             |             |             |             |            |             |             |            |                       | <i>dut(-84)/slmA(23):T&gt;C</i> |                                                                                          |                          |
|                 | DA68069      | c.380::IS186       |              |                               |                               |             |             |             |             |             |             |             |             |            |             |             |             |             |             |             |             |             |             |            |             |             |            |                       |                                 | <i>lhrA(137)/yrbQ(780)::IS5</i>                                                          |                          |
|                 | DA68070      | c.674::IS30        | c.115::IS186 | c.1003_1281del<br>Δ A335-G427 | c.2172_2184del<br>Δ A274-G727 |             |             |             |             |             |             |             |             |            |             |             |             |             |             |             |             |             |             |            |             |             |            |                       |                                 | <i>dut(-84)/slmA(23):T&gt;C</i>                                                          |                          |
|                 | DA68071      | c.674::IS30        |              | c.1003_1281del<br>Δ A335-G427 | c.2172_2184del<br>Δ A274-G727 |             |             |             |             |             |             |             |             |            |             |             |             |             |             |             |             |             |             |            |             |             |            |                       |                                 | <i>dut(-84)/slmA(23):T&gt;C</i>                                                          |                          |
|                 | DA68072      | c.380::IS186       |              |                               |                               |             |             |             |             |             |             |             |             |            |             |             |             |             |             |             |             |             |             |            |             |             |            |                       |                                 |                                                                                          |                          |
|                 | DA68074      | c.380::IS186       | c.115::IS186 |                               |                               |             |             |             |             |             |             |             |             |            |             |             |             |             |             |             |             |             |             |            |             |             |            |                       |                                 |                                                                                          |                          |
|                 | DA68076      | c.674::IS30        | c.115::IS186 | c.1003_1281del<br>Δ A335-G427 | c.2172_2184del<br>Δ A274-G727 |             |             |             |             |             |             |             |             |            |             |             |             |             |             |             |             |             |             |            |             |             |            |                       |                                 | <i>dut(-84)/slmA(23):T&gt;C</i>                                                          |                          |
| Sel.: 1/200xMIC | DA68056      | c.289del<br>L98 fs |              |                               |                               |             |             |             |             |             |             |             |             |            |             |             |             |             |             |             |             |             |             |            |             |             |            |                       | <i>csgC(-54)/ymdA(63)::IS2</i>  |                                                                                          |                          |
|                 | DA68057      | c.434T>G<br>L145 * |              |                               |                               |             |             |             |             |             |             |             |             |            |             |             |             |             |             |             |             |             |             |            |             |             |            |                       |                                 |                                                                                          |                          |
|                 | DA68058      | c.635G>A<br>W212*  |              |                               |                               |             |             |             |             |             |             |             |             |            |             |             |             |             |             |             |             |             |             |            |             |             |            |                       |                                 | <i>Δ ymdE-[ymdC](12.112kbp)</i><br><i>IS3-mediated</i><br><i>pyrE(42)/rph(-53)::Δ1bp</i> |                          |
|                 | DA68059      |                    |              |                               |                               |             |             |             |             |             |             |             |             |            |             |             |             |             |             |             |             |             |             |            |             |             |            |                       | <i>fimB(-461)/fimE(14)::IS5</i> |                                                                                          |                          |
|                 | DA68060      |                    |              |                               |                               |             |             |             |             |             |             |             |             |            |             |             |             |             |             |             |             |             |             |            |             |             |            |                       | <i>ompC(128)/rcsD(608)::IS5</i> | <i>Δ yrdA-yrdD(562bp)</i><br><i>IS1-mediated</i>                                         |                          |
|                 | DA68062      | c.380::IS186       |              |                               |                               |             |             |             |             |             |             |             |             |            |             |             |             |             |             |             |             |             |             |            |             |             |            |                       |                                 | <i>Δ ymdE-[ymdC](12.112kbp)</i><br><i>IS3-mediated</i><br><i>pyrE(42)/rph(-53)::Δ1bp</i> |                          |
|                 | DA68063      | c.380::IS186       |              |                               |                               |             |             |             |             |             |             |             |             |            |             |             |             |             |             |             |             |             |             |            |             |             |            |                       |                                 |                                                                                          |                          |
| DA68064         | c.380::IS186 |                    |              |                               |                               |             |             |             |             |             |             |             |             |            |             |             |             |             |             |             |             |             |             |            |             |             |            |                       | <i>c.304C&gt;A<br/>R102S</i>    | <i>fimE(-198)/fimA(281)::IS5</i>                                                         | <i>Δ marA-marB(94bp)</i> |

\* stop codon; Δ deletion; fs frame shift; del deletion; ins insertion; dup duplication; c. coding region

Genes mutated in our study that earlier have been described to confer resistance to nitrofurantoin

Genes mutated in our study that earlier have been described as genetic adaptations to growth in laboratory conditions (Knöppel et al., 2018)

Genes mutated in our study that earlier have been described to confer antimicrobial resistance

Strains in our study that were found to be hypermutators

**Supplementary Fig. 3.** Mutations identified through whole-genome sequencing of resistant mutants isolated at the end-point of the experiment for populations evolving at sub-MICs of A) Fosfomycin B) Tetracycline C) Nitrofurantoin and D) Ciprofloxacin. Genes marked green are known resistance genes for the antibiotic on which selection was performed, those marked in yellow are known resistance genes but for other antibiotics and those marked red have been shown to confer media adaptation.

**D.**

|                |         | <i>ydcl</i>                 | <i>gyrB</i>              | <i>ptsP</i>               | <i>icd</i>                                                                                                     | <i>emrA</i>       | <i>yphG</i>        | <i>ssuD</i>       | <i>rph</i>              | <i>yhal</i>   | <i>trkH</i>        | <i>gyrA</i> | <i>ymdA</i> | <i>caiD</i> | <i>fimE</i> | <i>brnQ</i> | <i>ydH</i> | <i>tap</i> | <i>proB</i> | <i>kdpD</i> | <i>ycdT</i> | <i>cho</i> | <i>ydeO</i> | <i>oxyR</i> | <i>ssuA</i> | <i>rpsF</i> | Intergenic insertions                            | Deletions             |  |  |  |                                                   |                                                                                  |                                   |
|----------------|---------|-----------------------------|--------------------------|---------------------------|----------------------------------------------------------------------------------------------------------------|-------------------|--------------------|-------------------|-------------------------|---------------|--------------------|-------------|-------------|-------------|-------------|-------------|------------|------------|-------------|-------------|-------------|------------|-------------|-------------|-------------|-------------|--------------------------------------------------|-----------------------|--|--|--|---------------------------------------------------|----------------------------------------------------------------------------------|-----------------------------------|
| Sel.: 1/4xMIC  | DA70121 | c.859_894del<br>Δ D286-I298 | c.1389_1394del<br>A65 fs | c.1545_1555del<br>R119 fs | c.1098C>T H366=<br>c.1123T>C L375=                                                                             | c.591A>T<br>P197= | c.2250T>C<br>L750= |                   |                         |               |                    |             |             |             |             |             |            |            |             |             |             |            |             |             |             |             |                                                  |                       |  |  |  |                                                   |                                                                                  |                                   |
|                | DA70122 |                             | c.1389_1394del<br>A65 fs |                           | c.1098C>T H366=<br>c.1100C>T T370=<br>c.1123T>C L375=<br>c.1155C>T N385=<br>c.1158G>C A386=<br>c.1161A>G K387= |                   | c.2250T>C<br>L750= | c.703T>C<br>E243= | c.559_560del<br>S186 fs | c.68::<br>IS1 | c.1040C>A<br>A347D |             |             |             |             |             |            |            |             |             |             |            |             |             |             |             | yai[S1547]tauA (66)::IS5<br>m[E(-13)]m[E(81)]G>C | m[E(-27)]m[E(67)]Tdel |  |  |  |                                                   |                                                                                  |                                   |
|                | DA70123 |                             |                          | c.1545_1555del<br>R119 fs |                                                                                                                |                   |                    |                   |                         |               |                    |             |             |             |             |             |            |            |             |             |             |            |             |             |             |             |                                                  |                       |  |  |  | pyr[E(46)]rph(-49);C>T<br>glt(T(-171)]m[B(23)]A>T |                                                                                  |                                   |
|                | DA70124 | c.735_744del<br>Δ E79-Y248  |                          | c.1545_1555del<br>R119 fs |                                                                                                                |                   |                    |                   |                         |               |                    |             |             |             |             |             |            |            |             |             |             |            |             |             |             |             |                                                  |                       |  |  |  |                                                   | mipA(358)yeeG (74)::IS2<br>ykgD(-427)ykgE(97)::IS5<br>cirA(230)lysP(-64)G>T      | Δ (uspC otaA [otsB])<br>(2.153bp) |
|                | DA70129 |                             |                          | c.328_330dup<br>L111 fs   |                                                                                                                |                   |                    |                   |                         |               |                    |             |             |             |             |             |            |            |             |             |             |            |             |             |             |             |                                                  |                       |  |  |  |                                                   | pyr[E(46)]rph(-49);C>T<br>glt(T(-171)]m[B(23)]A>T                                |                                   |
|                | DA70130 |                             |                          | c.328_330dup<br>L111 fs   |                                                                                                                |                   |                    |                   |                         |               |                    |             |             |             |             |             |            |            |             |             |             |            |             |             |             |             |                                                  |                       |  |  |  |                                                   | pyr[E(46)]rph(-49);C>T<br>glt(T(-171)]m[B(23)]A>T<br>yjlL310)yjM(-50)insTARGGCAC |                                   |
|                | DA70132 |                             |                          | c.328_330dup<br>L111 fs   |                                                                                                                |                   |                    |                   |                         |               |                    |             |             |             |             |             |            |            |             |             |             |            |             |             |             |             |                                                  |                       |  |  |  |                                                   | pyr[E(46)]rph(-49);C>T<br>glt(T(-171)]m[B(23)]A>T<br>yjlL310)yjM(-50)insTARGGCAC |                                   |
| Sel.: 1/10xMIC | DA70133 |                             | c.1389_1394del<br>A65 fs |                           | c.1098C>T H366=<br>c.1100C>T T370=<br>c.1123T>C L375=                                                          |                   | c.2250T>C<br>L750= |                   |                         |               |                    |             |             |             |             |             |            |            |             |             |             |            |             |             |             |             |                                                  |                       |  |  |  | pyr[E(40)]rph(-55)delA<br>pflA(188)]pflB(-4);C>T  |                                                                                  |                                   |
|                | DA70134 |                             | c.1389_1394del<br>A65 fs |                           | c.1098C>T H366=<br>c.1100C>T T370=<br>c.1123T>C L375=                                                          |                   | c.2250T>C<br>L750= |                   |                         |               |                    |             |             |             |             |             |            |            |             |             |             |            |             |             |             |             |                                                  |                       |  |  |  |                                                   | fimE(-363)]fimA(119)insA                                                         |                                   |
|                | DA70135 |                             |                          | c.1678_1681del<br>T560 fs |                                                                                                                |                   |                    |                   |                         |               |                    |             |             |             |             |             |            |            |             |             |             |            |             |             |             |             |                                                  |                       |  |  |  |                                                   | pspR(96)]pspA (71): A>G<br>Δ (ydcJ [ydcI]) (1566bp)                              |                                   |
|                | DA70137 |                             |                          |                           |                                                                                                                |                   |                    |                   |                         |               |                    |             |             |             |             |             |            |            |             |             |             |            |             |             |             |             |                                                  |                       |  |  |  |                                                   | c.710T>C<br>D337G                                                                | c.349_350del<br>A116 fs           |

\* stop codon; Δ deletion; fs frame shift; del deletion; ins insertion; dup duplication; c. coding region

Genes mutated in our study that earlier have been described to confer resistance to ciprofloxacin

Genes mutated in our study that earlier have been described as genetic adaptations to growth in laboratory conditions (Knöppel et al., 2018)

Genes mutated in our study that earlier have been described to confer antimicrobial resistance







|         |            |                                                                                                                               |
|---------|------------|-------------------------------------------------------------------------------------------------------------------------------|
| DA70125 | This study | <i>E. coli</i> mutant isolated from evolution in presence of ciprofloxacin at concentration of 1/4 the MIC of the WT strain.  |
| DA70126 | This study | <i>E. coli</i> mutant isolated from evolution in presence of ciprofloxacin at concentration of 1/4 the MIC of the WT strain.  |
| DA70127 | This study | <i>E. coli</i> mutant isolated from evolution in presence of ciprofloxacin at concentration of 1/4 the MIC of the WT strain.  |
| DA70128 | This study | <i>E. coli</i> mutant isolated from evolution in presence of ciprofloxacin at concentration of 1/4 the MIC of the WT strain.  |
| DA70129 | This study | <i>E. coli</i> mutant isolated from evolution in presence of ciprofloxacin at concentration of 1/4 the MIC of the WT strain.  |
| DA70130 | This study | <i>E. coli</i> mutant isolated from evolution in presence of ciprofloxacin at concentration of 1/4 the MIC of the WT strain.  |
| DA70132 | This study | <i>E. coli</i> mutant isolated from evolution in presence of ciprofloxacin at concentration of 1/4 the MIC of the WT strain.  |
| DA70133 | This study | <i>E. coli</i> mutant isolated from evolution in presence of ciprofloxacin at concentration of 1/10 the MIC of the WT strain. |
| DA70134 | This study | <i>E. coli</i> mutant isolated from evolution in presence of ciprofloxacin at concentration of 1/10 the MIC of the WT strain. |
| DA70135 | This study | <i>E. coli</i> mutant isolated from evolution in presence of ciprofloxacin at concentration of 1/10 the MIC of the WT strain. |
| DA70136 | This study | <i>E. coli</i> mutant isolated from evolution in presence of ciprofloxacin at concentration of 1/10 the MIC of the WT strain. |
| DA70137 | This study | <i>E. coli</i> mutant isolated from evolution in presence of ciprofloxacin at concentration of 1/10 the MIC of the WT strain. |
| DA70138 | This study | <i>E. coli</i> mutant isolated from evolution in presence of ciprofloxacin at concentration of 1/10 the MIC of the WT strain. |

**Supplementary Table 2.** Frequency of resistant mutants observed at different sub-MICs

| <b>Fosfomycin</b> | <b>Selective Concentration</b> | <b>2xMIC</b> | <b>8xMIC</b> | <b>16xMIC</b> |
|-------------------|--------------------------------|--------------|--------------|---------------|
|                   | 1/4                            | 1            | 1            | 1             |
|                   | 1/10                           | 1            | 1            | 1             |
|                   | 1/20                           | 1            | 1            | 1             |
|                   | 1/50                           | 1            | 1            | 1             |
|                   | 1/200                          | 2.90E-04     | 1.60E-04     | 2.80E-05      |
|                   | 1/500                          | 2.80E-04     | 3.40E-05     | 8.90E-06      |
|                   | 1/1000                         | 1.80E-04     | 1.30E-05     | 1.10E-05      |
|                   | 1/2000                         | 2.00E-04     | 4.00E-05     | 6.20E-06      |
|                   | control evolved populations    | 1.19E-05     | 4.39E-06     | 1.76E-06      |

  

| <b>Tetracycline</b> | <b>Selective Concentration</b> | <b>4X</b> | <b>8X</b> | <b>16X</b> |
|---------------------|--------------------------------|-----------|-----------|------------|
|                     | 1/4                            | 1         | 1         | 1          |
|                     | 1/10                           | 1         | 1         | 2.80E-06   |
|                     | 1/20                           | 1         | 1         | 5.50E-05   |
|                     | 1/50                           | 1         | 9.90E-05  | 3.90E-06   |
|                     | 1/200                          | 1         | 9.70E-06  | 0          |
|                     | 1/500                          | 4.90E-06  | 0         | 0          |
|                     | 1/1000                         | 6.50E-06  | 0         | 0          |
|                     | 1/2000                         | 6.50E-06  | 0         | 0          |
|                     | control evolved populations    | 1.6E-05   | 0         | 0          |

  

| <b>Nitrofurantoin</b> | <b>Selective Concentration</b> | <b>4xMIC</b> | <b>8xMIC</b>           | <b>16xMIC</b>          |
|-----------------------|--------------------------------|--------------|------------------------|------------------------|
|                       | 1/4                            | 1            | 1.8 x 10 <sup>-6</sup> | 5.0 x 10 <sup>-7</sup> |
|                       | 1/10                           | 1            | 5.0 x 10 <sup>-7</sup> | 0                      |
|                       | 1/20                           | 4.10E-05     | 6.2 x 10 <sup>-7</sup> | 0                      |
|                       | 1/50                           | 7.20E-05     | 5.0 x 10 <sup>-7</sup> | 0                      |
|                       | 1/200                          | 1            | 1.0 x 10 <sup>-5</sup> | 0                      |
|                       | 1/500                          | 1.00E-05     | 0                      | 0                      |
|                       | 1/1000                         | 2.00E-05     | 0                      | 0                      |
|                       | 1/2000                         | 3.80E-06     | 0                      | 0                      |
|                       | control evolved populations    | 3.21E-07     | 0                      | 0                      |

  

| <b>Ciprofloxacin</b> | <b>Selective Concentration</b> | <b>2xMIC</b> | <b>8xMIC</b> | <b>16xMIC</b> |
|----------------------|--------------------------------|--------------|--------------|---------------|
|                      | 1/4                            | 1            | 1            | 0             |
|                      | 1/10                           | 1            | 0            | 0             |
|                      | 1/20                           | 0            | 0            | 0             |
|                      | 1/50                           | 0            | 0            | 0             |
|                      | 1/200                          | 0            | 0            | 0             |
|                      | 1/500                          | 0            | 0            | 0             |
|                      | 1/1000                         | 0            | 0            | 0             |
|                      | 1/2000                         | 0            | 0            | 0             |
|                      | control evolved populations    | 0            | 0            | 0             |

**Supplementary Table 3.** Description of genes that contain mutations as identified by whole-genome sequencing of resistant mutants.

| Gene        | Description                                           | Clones with mutations (Mutation)                                                                                                                                                                                                                                                                                                                                                                                                                                                                                                                                                                                                                                                                                                                                 | Potential fitness benefit            |
|-------------|-------------------------------------------------------|------------------------------------------------------------------------------------------------------------------------------------------------------------------------------------------------------------------------------------------------------------------------------------------------------------------------------------------------------------------------------------------------------------------------------------------------------------------------------------------------------------------------------------------------------------------------------------------------------------------------------------------------------------------------------------------------------------------------------------------------------------------|--------------------------------------|
| <i>aat</i>  | leucyl/phenylalanyl-tRNA-protein transferase          | DA66928 (G146D); DA67610 (N191D); DA67619 (N191D); DA67620 (N191D); DA68060 (c.125::IS1); DA68063 (c.125::IS1)                                                                                                                                                                                                                                                                                                                                                                                                                                                                                                                                                                                                                                                   | Undetermined                         |
| <i>allB</i> | allantoinase                                          | DA66935 (S45R)                                                                                                                                                                                                                                                                                                                                                                                                                                                                                                                                                                                                                                                                                                                                                   | Undetermined                         |
| <i>bglG</i> | transcriptional anti terminator                       | DA66931 (L82*)                                                                                                                                                                                                                                                                                                                                                                                                                                                                                                                                                                                                                                                                                                                                                   | Media adaptation <sup>1</sup>        |
| <i>brnQ</i> | membrane protein                                      | DA70124 ( $\Delta$ M419-L422)                                                                                                                                                                                                                                                                                                                                                                                                                                                                                                                                                                                                                                                                                                                                    | Undetermined                         |
| <i>caiD</i> | crotonobetainyl-CoA hydratase                         | DA70123 (E167A)                                                                                                                                                                                                                                                                                                                                                                                                                                                                                                                                                                                                                                                                                                                                                  | Undetermined                         |
| <i>cheA</i> | histidine protein kinase                              | DA68058 (A42V); DA68062 (A42V)                                                                                                                                                                                                                                                                                                                                                                                                                                                                                                                                                                                                                                                                                                                                   | Undetermined                         |
| <i>cho</i>  | endonuclease of nucleotide excision repair            | DA70135 (A131T)                                                                                                                                                                                                                                                                                                                                                                                                                                                                                                                                                                                                                                                                                                                                                  | Undetermined                         |
| <i>degQ</i> | periplasmic serine endoprotease                       | DA68062 (I119T)                                                                                                                                                                                                                                                                                                                                                                                                                                                                                                                                                                                                                                                                                                                                                  | Antibiotic resistance <sup>2</sup>   |
| <i>dhaK</i> | dihydroxyacetone kinase subunit K                     | DA67608 (G268=)                                                                                                                                                                                                                                                                                                                                                                                                                                                                                                                                                                                                                                                                                                                                                  | Undetermined                         |
| <i>elaD</i> | deubiquitinating protease                             | DA67607 (A321=)                                                                                                                                                                                                                                                                                                                                                                                                                                                                                                                                                                                                                                                                                                                                                  | Undetermined                         |
| <i>emrA</i> | multidrug efflux pump membrane fusion protein         | DA70121 (P197=)                                                                                                                                                                                                                                                                                                                                                                                                                                                                                                                                                                                                                                                                                                                                                  | Antibiotic resistance <sup>3</sup>   |
| <i>envZ</i> | sensor histidine kinase                               | DA67599 (L22F); DA67601 (R14C); DA67602 (R14C); DA67604 (P148S); DA67608 (R397C); DA67609 (R397C); DA67610 (V49A); DA67619 (V49A); DA67620 (V49A)                                                                                                                                                                                                                                                                                                                                                                                                                                                                                                                                                                                                                | Antibiotic resistance <sup>4,5</sup> |
| <i>fbaA</i> | fructose-bisphosphate aldolase                        | DA67599 (N154S); DA67602 (V235A)                                                                                                                                                                                                                                                                                                                                                                                                                                                                                                                                                                                                                                                                                                                                 | Antibiotic resistance <sup>2</sup>   |
| <i>fimE</i> | fimbral protein                                       | DA66920 (c.214::IS1); DA66922 (c.125::IS5); DA66923 (c.125::IS5); DA66925 (c.272::IS5); DA66927 (c.272::IS5); DA66929 (c.125::IS5); DA66930 (c.125::IS5); DA66935 (c.201::IS1); DA67602 (c.501::IS1); DA67604 (c.168::IS1); DA67605 (c.272::IS5); DA67608 (c.272::IS5); DA67609 (c.272::IS5); DA67610 (c.272::IS5); DA67612 (c.125::IS5); DA67618 (c.125::IS5); DA67619 (c.125::IS5); DA67620 (c.125::IS5); DA67621 (c.125::IS5); DA68057 (c.272::IS5); DA68058 (T87P); DA68060 (H73P); DA68062 (T87P); DA68063 (H73P); DA68074 (c.125::IS5); DA69423 (c.125::IS5); DA69424 (c.6::IS1); DA69427 (G163 fs); DA69428 (G163 fs); DA69429 (c.519::IS5); DA69430 (c.519::IS5); DA70123 (c.125::IS5); DA70129 (c.125::IS5); DA70130 (c.125::IS5); DA70132 (c.125::IS5) | Media adaptation <sup>6</sup>        |
| <i>gatA</i> | galactitol-specific PTS enzyme                        | DA69427 (c.203::IS5)                                                                                                                                                                                                                                                                                                                                                                                                                                                                                                                                                                                                                                                                                                                                             | Undetermined                         |
| <i>gatB</i> | galactitol-specific PTS enzyme                        | DA69428 (c.68::IS5)                                                                                                                                                                                                                                                                                                                                                                                                                                                                                                                                                                                                                                                                                                                                              | Undetermined                         |
| <i>gatC</i> | galactitol-specific PTS enzyme                        | DA67605 (c.85::IS5); DA67608 (c.85::IS5); DA67609 (c.85::IS5); DA67610 (c.626::IS5); DA67612 (c.626::IS5); DA67619 (c.626::IS5); DA67620 (c.626::IS5); DA67621 (c.626::IS5)                                                                                                                                                                                                                                                                                                                                                                                                                                                                                                                                                                                      | Undetermined                         |
| <i>gatY</i> | tagatose-1,6-bisphosphate aldolase 2                  | DA67599 (c.644::IS5)                                                                                                                                                                                                                                                                                                                                                                                                                                                                                                                                                                                                                                                                                                                                             | Media adaptation <sup>6</sup>        |
| <i>glpT</i> | <i>sn</i> -glycerol 3-phosphate: phosphate antiporter | DA66920 (D88E); DA66921 (c.862::IS5); DA66922 (c.862::IS5); DA66923 (c.862::IS5); DA66924 (V86 fs); DA66925 (D88E); DA66926 (L255R); DA66927 (D88E); DA66933 (P212 fs)                                                                                                                                                                                                                                                                                                                                                                                                                                                                                                                                                                                           | Antibiotic resistance <sup>7</sup>   |

|             |                                                                   |                                                                                                                                                                                                                                                                                                                                                               |                                       |
|-------------|-------------------------------------------------------------------|---------------------------------------------------------------------------------------------------------------------------------------------------------------------------------------------------------------------------------------------------------------------------------------------------------------------------------------------------------------|---------------------------------------|
|             |                                                                   | DA69421 (c.909::IS5); DA69429 ( $\Delta$ I443-R456)                                                                                                                                                                                                                                                                                                           |                                       |
| <i>gyrA</i> | DNA gyrase subunit A                                              | DA70123 (G81D); DA70124 (S96 fs); DA70129 (G81D)<br>DA70130 (G81D); DA70132 (G81D); DA70135 (D40 fs)<br>DA70137 (D87G)                                                                                                                                                                                                                                        | Antibiotic resistance <sup>8</sup>    |
| <i>gyrB</i> | DNA gyrase subunit B                                              | DA70121 (A65 fs), DA70122 (A65 fs)<br>DA70133 (A65 fs); DA70133 (A65 fs)                                                                                                                                                                                                                                                                                      | Antibiotic resistance <sup>9,10</sup> |
| <i>hchA</i> | protein/nucleic acid deglycase 1                                  | DA66929 (c.635::IS1); DA66930 (c.635::IS1)                                                                                                                                                                                                                                                                                                                    | Undetermined                          |
| <i>icd</i>  | isocitrate dehydrogenase                                          | DA70121 (H366=; L375=)<br>DA70122 (H336=; T370=; L375=; N385=; A366=; K387=)<br>DA70133 (H366=; L375=, T370=); DA70133 (H366=;<br>L375=, T370=)                                                                                                                                                                                                               | Undetermined                          |
| <i>iscR</i> | DNA-binding transcriptional dual regulator                        | DA666924 (P61L)                                                                                                                                                                                                                                                                                                                                               | Undetermined                          |
| <i>kdpD</i> | sensor histidine kinase                                           | DA66921 (R508H); DA66922 (D774G); DA66923 (D774G)<br>DA66924 (G836E); DA66926 (R620L); DA66929 (R511L)<br>DA66930 (R511L); DA66931 (E651A); DA67610 (S275P)<br>DA67613 (V329A); DA67620 (S275); DA68056 (V845G)<br>DA68059 (S541P); DA68060 (A426V); DA68063 (A426V)<br>DA68064 (T633M); DA69427 (R508H); DA69428 (R508H)<br>DA70133 (R508H); DA70134 (R508H) | Media adaptation (this study)         |
| <i>leuV</i> | tRNA-Leu (CAG)                                                    | DA68069 (c.65::IS186)                                                                                                                                                                                                                                                                                                                                         | Undetermined                          |
| <i>malT</i> | DNA-binding transcriptional activator                             | DA67599 (T220P)                                                                                                                                                                                                                                                                                                                                               | Media adaptation <sup>6</sup>         |
| <i>mdtF</i> | multidrug efflux pump permease                                    | DA66921 (c.1402::IS1)<br>DA66929 (c.1402::IS1); DA66930 (c.1402::IS1)<br>DA66935 (c.1402::IS1); DA67599 (c.402::IS1)<br>DADA67610 (V766A); DA67611 (c.1402::IS1)<br>DA67613 (c.1402::IS1)                                                                                                                                                                     | Antibiotic resistance <sup>11</sup>   |
| <i>mdtH</i> | multidrug efflux pump                                             | DA68062 (P99Q)                                                                                                                                                                                                                                                                                                                                                | Antibiotic resistance <sup>12</sup>   |
| <i>menC</i> | o-succinylbenzoate synthase                                       | DA68069 (c.132::IS196)                                                                                                                                                                                                                                                                                                                                        | Undetermined                          |
| <i>mpaA</i> | murein tripeptide amidase A                                       | DA68056 (D185E)                                                                                                                                                                                                                                                                                                                                               | Undetermined                          |
| <i>mutL</i> | DNA mismatch repair protein                                       | DA67610 (L92P); DA67612 (L92P); DA67618 (L92P)<br>DA67619 (L92P); DA67620 (L92P)                                                                                                                                                                                                                                                                              | Undetermined                          |
| <i>mutS</i> | DNA mismatch repair protein                                       | DA67601 (G218E; c.2444::IS1); DA67602 (c.2444::IS1)<br>DA67613 (R656S)                                                                                                                                                                                                                                                                                        | Undetermined                          |
| <i>mutT</i> | 8-oxo-dGTP diphosphatase                                          | DA68057 (R23L)                                                                                                                                                                                                                                                                                                                                                | Undetermined                          |
| <i>nfsA</i> | NADPH-dependent nitroreductase/ NADPH-dependent quinone reductase | DA68056 (L98 fs); DA68057(L145*); DA68058 (W212*)<br>DA68062 (c.380::IS186); DA68063 (c.380::IS186)<br>DA68064 (c.380::IS186); DA68067 (c.674::IS30)<br>DA68068 (c.674::IS30); DA68069 (c.380::IS186)<br>DA68070 (c.674::IS30); DA68071 (c.674::IS30)<br>DA68072 (c.380::IS186); DA68074 (c.380::IS186)<br>DA68076 (c.674::IS30)                              | Antibiotic resistance <sup>13</sup>   |
| <i>nfsB</i> | NAD(P)H-dependent nitroreductase                                  | DA68058 (c.38::IS5); DA68069 (c.38::IS5)<br>DA68072 (c.38::IS5); DA68074 (c.38::IS5)                                                                                                                                                                                                                                                                          | Antibiotic resistance <sup>13</sup>   |
| <i>nhaR</i> | DNA-binding transcriptional activator                             | DA69424 ( $\Delta$ I124-C360 IS1-mediated)                                                                                                                                                                                                                                                                                                                    | Undetermined                          |
| <i>nmpC</i> | DLP12 prophase; putative outer membrane porin                     | DA66926 ( $\Delta$ L1-A337 IS5-mediated)                                                                                                                                                                                                                                                                                                                      | Undetermined                          |
| <i>oxyR</i> | DNA-binding transcriptional dual regulator                        | DA70135 (L191 fs)                                                                                                                                                                                                                                                                                                                                             | Undetermined                          |
| <i>plsB</i> | glycerol-3-phosphate 1-O-acyltransferase                          | DA67608 (R265L); DA67609 (R265L)                                                                                                                                                                                                                                                                                                                              | Undetermined                          |
| <i>proB</i> | glutamate 5-kinase                                                | DA70130 (R118 fs); DA70131 (R118 fs)                                                                                                                                                                                                                                                                                                                          | Undetermined                          |
| <i>ptsI</i> | phosphoenolpyruvate-protein phosphotransferase PtsI               | DA66934 (H439 fs)                                                                                                                                                                                                                                                                                                                                             | Antibiotic resistance <sup>14</sup>   |

|             |                                                                        |                                                                                                                                                                                                                                                                                                                                                                                                   |                                                            |
|-------------|------------------------------------------------------------------------|---------------------------------------------------------------------------------------------------------------------------------------------------------------------------------------------------------------------------------------------------------------------------------------------------------------------------------------------------------------------------------------------------|------------------------------------------------------------|
|             |                                                                        |                                                                                                                                                                                                                                                                                                                                                                                                   |                                                            |
| <i>ptsP</i> | phosphoenolpyruvate-protein phosphotransferase PtsP                    | DA66920 (Q340*); DA66932 (A239 fs); DA66933 (A239 fs)<br>DA66934 (A239 fs); DA67610 (C668R); DA67612 (C668R)<br>DA67613 (S355P); DA67619 (C668R); DA67620 (C668R)<br>DA68057 (L425*); DA68058 (N23 fs); DA68062 (N23 fs)<br>DA70121 (R119 fs), DA70123 (R119 fs); DA70124 (R119 fs)<br>DA70129 (L111 fs); DA70130 (L111 fs); DA70132 (L111 fs)<br>DA70135 (T560 fs)                               | Media adaptation                                           |
| <i>ptwF</i> |                                                                        | DA68060 (R1=); DA68063 (R1=); DA68069 (R1=)                                                                                                                                                                                                                                                                                                                                                       | Undetermined                                               |
| <i>putP</i> | proline:Na <sup>+</sup> symporter                                      | DA66935 (L60Q); DA68060 (V338L); DA68063 (V338L)                                                                                                                                                                                                                                                                                                                                                  | Undetermined                                               |
| <i>puuB</i> | $\gamma$ -glutamylputrescine oxidase                                   | DA69424 (G254=)                                                                                                                                                                                                                                                                                                                                                                                   | Undetermined                                               |
| <i>rbsR</i> | DNA-binding transcriptional dual regulator                             | DA66928 (A181T); DA66932 (c.360::IS2); DA66933 (c.360::IS2)<br>DA66934 (c.360::IS2); DA69429 (T169M); DA69430 (T169M)                                                                                                                                                                                                                                                                             | Undetermined                                               |
| <i>relA</i> | GDP/GTP pyrophosphokinase                                              | DA68067 ( $\Delta$ A274-G727); DA68068 ( $\Delta$ A274-G727)<br>DA68070 ( $\Delta$ A274-G727); DA68071 ( $\Delta$ A274-G727)<br>DA68076 ( $\Delta$ A274-G727)                                                                                                                                                                                                                                     | Media adaptation <sup>6</sup>                              |
| <i>rho</i>  | transcription termination factor                                       | DA67599 (R87C); DA67604 (S84C); DA68064 (R102S)                                                                                                                                                                                                                                                                                                                                                   | Antibiotic resistance <sup>15</sup>                        |
| <i>rph</i>  | truncated RNAase PH                                                    | DA66921 (E507*); DA66928 ( $\Delta$ A203-R230); DA68056 ( $\Delta$ A203-R230)<br>DA68059 ( $\Delta$ A203-R230); DA68060 ( $\Delta$ A203-R230)<br>DA68063 ( $\Delta$ A203-R230); DA69421 ( $\Delta$ A203-R230)<br>DA69423 ( $\Delta$ A203-R230); DA69424 ( $\Delta$ A203-R230)<br>DA69429 ( $\Delta$ A203-R230); DA69430 ( $\Delta$ A203-R230)<br>DA70122 (S186 fs); DA70135 ( $\Delta$ A203-R230) | Media adaptation <sup>6</sup>                              |
| <i>rpoC</i> | RNA polymerase subunit $\beta'$                                        | DA67601 (A726T; T1050A)                                                                                                                                                                                                                                                                                                                                                                           | Media adaptation <sup>6</sup>                              |
| <i>rpsF</i> | 30S ribosomal subunit protein S6                                       | DA70137 (A116 fs)                                                                                                                                                                                                                                                                                                                                                                                 | Undetermined                                               |
| <i>rpsK</i> | 30S ribosomal subunit protein S11<br>30S ribosomal subunit protein S11 | DA68069 (G39D)                                                                                                                                                                                                                                                                                                                                                                                    | Undetermined                                               |
| <i>sapC</i> | putrescine ABC exporter membrane protein SapC                          | DA69424 (P65T)                                                                                                                                                                                                                                                                                                                                                                                    | Undetermined                                               |
| <i>ssuA</i> | aliphatic sulfonate ABC transporter periplasmic binding protein        | DA70137 (D337G)                                                                                                                                                                                                                                                                                                                                                                                   | Undetermined                                               |
| <i>ssuD</i> | FMNH <sub>2</sub> -dependent alkanesulfonate monooxygenase             | DA70122 (E243=)                                                                                                                                                                                                                                                                                                                                                                                   | Undetermined                                               |
| <i>suhB</i> | Nus factor SuhB                                                        | DA67618 (G233=)                                                                                                                                                                                                                                                                                                                                                                                   | Undetermined                                               |
| <i>tap</i>  | methyl-accepting chemotaxis protein-dipeptide-sensing protein          | DA70129 (c.822_832dup)                                                                                                                                                                                                                                                                                                                                                                            | Undetermined                                               |
| <i>trkA</i> | NAD-binding component of Trk potassium transporters                    | DA67608 (S360R)                                                                                                                                                                                                                                                                                                                                                                                   | Media adaptation <sup>6</sup>                              |
| <i>trkH</i> | K <sup>+</sup> transporter TrkH                                        | DA66925 (L80K); DA66927 (L80K)<br>DA66935 (Y130H); DA70122 (A347D)                                                                                                                                                                                                                                                                                                                                | Media adaptation and Antibiotic resistance <sup>6,16</sup> |
| <i>ubiF</i> | 2-octaprenyl-3-methyl-6-methoxy-1,4-benzoquinol hydroxylase            | DA66922 (R235=); DA66923 (R235=)                                                                                                                                                                                                                                                                                                                                                                  | Antibiotic resistance <sup>17</sup>                        |
| <i>uhpA</i> | DNA-binding transcriptional activator                                  | DA66924 ( $\Delta$ L43-G45); DA69421 ( $\Delta$ A41-L43)<br>DA69429 ( $\Delta$ A41-L43); DA69430 ( $\Delta$ A41-L43)                                                                                                                                                                                                                                                                              | Antibiotic resistance <sup>14</sup>                        |
| <i>uhpB</i> | sensory histidine kinase                                               | DA66931 (V33 fs); DA66932 (W132*)<br>DA66933 (G469R); DA66935 (c.1012::IS1)                                                                                                                                                                                                                                                                                                                       | Antibiotic resistance <sup>18</sup>                        |
| <i>uhpC</i> | inner membrane protein sensing glucose-6-phosphate                     | DA66922 (T72P); DA6923 (T72P)<br>DA66929 (c.235::IS5); DA66930 (A129T); DA66934 (Q34*)                                                                                                                                                                                                                                                                                                            | Antibiotic resistance <sup>18</sup>                        |

|             |                                                          |                                                                                                                                                                                                                                                                                                                       |                                       |
|-------------|----------------------------------------------------------|-----------------------------------------------------------------------------------------------------------------------------------------------------------------------------------------------------------------------------------------------------------------------------------------------------------------------|---------------------------------------|
|             |                                                          | DA69423 (c.760::IS5); DA69427 (N164K); DA69428 (ΔQ131-S143)                                                                                                                                                                                                                                                           |                                       |
| <i>uhpT</i> | hexose-6-phosphate:phosphate antiporter                  | DA66920 (c.214::IS1); DA66921 (F365L); DA66925 (c.948::IS186)<br>DA66927 (c.948::IS186); DA66928 (P423 fs)<br>DA68067 (ΔA335-G427); DA68068 (ΔA335-G427)<br>DA68070 (ΔA335-G427); DA68071 (ΔA335-G427)<br>DA68076 (ΔA335-G427); DA69420 (c.382::IS2)<br>DA69424 (c.118::IS1)                                          | Antibiotic resistance <sup>7,18</sup> |
| <i>yahL</i> | uncharacterized protein YahL                             | DA67599 (c.527::IS5)                                                                                                                                                                                                                                                                                                  | Undetermined                          |
| <i>ycgB</i> | PF04293 family protein                                   | DA68069 (c.192::IS2)                                                                                                                                                                                                                                                                                                  | Undetermined                          |
| <i>ydcl</i> | DNA-binding transcriptional regulator                    | DA66921 (c.21::IS1); DA66922 (K258*); DA66923 (c.85::IS2)<br>DA66924 (H77R); DA66927 (T233M); DA66929 (Q58 fs)<br>DA66930 (Q58 fs); DA66931 (F2 fs); DA66933 (c.241::IS2);<br>DA68056 (N4 fs); DA68064 (c.278::IS2)<br>DA69421 (R14L); DA69423 (L123S); DA69428 (S92 fs)<br>DA70121 (ΔD286-I298); DA70124 (ΔE79-Y248) | Antibiotic resistance <sup>19</sup>   |
| <i>ydcT</i> | putative ABC transporter ATP-binding protein             | DA70133 (S11=)                                                                                                                                                                                                                                                                                                        | Undetermined                          |
| <i>ydeJ</i> | PF02464 family protein                                   | DA66933 (c.29::IS2)                                                                                                                                                                                                                                                                                                   | Undetermined                          |
| <i>ydeO</i> | DNA-binding transcriptional dual regulator               | DA70135 (S2=)                                                                                                                                                                                                                                                                                                         | Undetermined                          |
| <i>ydhL</i> | DUF1289 domain-containing protein                        | DA70124 (R63H)                                                                                                                                                                                                                                                                                                        | Undetermined                          |
| <i>yeal</i> | putative c-di-GMP binding protein                        | DA66924 (F343L)                                                                                                                                                                                                                                                                                                       | Undetermined                          |
| <i>yeaR</i> | DU1971 domain-containing protein                         | DA67599 (c.115::IS186); DA68067 (c.115::IS186)<br>DA68068 (c.115::IS186); DA68070 (c.115::IS186)<br>DA68074 (c.115::IS186); DA68076 (c.115::IS186)                                                                                                                                                                    | Undetermined                          |
| <i>yegX</i> | putative glycosyl hydrolase                              | DA69420 (P192Q)                                                                                                                                                                                                                                                                                                       | Undetermined                          |
| <i>yehH</i> | pseudogene                                               | DA66923 (V254A)                                                                                                                                                                                                                                                                                                       | Undetermined                          |
| <i>yfaS</i> | putative macroglobulin family protein, N-terminal family | DA68068 (T30I)                                                                                                                                                                                                                                                                                                        | Undetermined                          |
| <i>yfdE</i> | acetyl-CoA:oxalate CoA-transferase                       | DA68058 (c.457::IS2)                                                                                                                                                                                                                                                                                                  | Undetermined                          |
| <i>yffS</i> | CPZ-55 prophage; uncharacterized protein YffS            | DA66928 (A148T)                                                                                                                                                                                                                                                                                                       | Undetermined                          |
| <i>yhaC</i> | uncharacterized protein                                  | DA68056 (c.1101::IS5)                                                                                                                                                                                                                                                                                                 | Undetermined                          |
| <i>yhal</i> | putative inner membrane protein                          | DA70122 (c.68::IS1)                                                                                                                                                                                                                                                                                                   | Undetermined                          |
| <i>ymdA</i> | uncharacterized protein                                  | DA66930 (G59 fs); DA66933 (c.289::IS2); DA67610 (c.303::IS5);<br>DA67611 (c.48delT); DA67612 (c.309::IS5); DA67613 (c.309::IS5)<br>DA67618 (c.309::IS5); DA67619 (c.309::IS5); DA67620 (c.309::IS5)<br>DA67621 (c.309::IS5); DA70123 (c.308::IS5); DA70129 (F18 fs); DA70130 (c.309::IS5); DA70132 (c.309::IS5)       | Undetermined                          |
| <i>yobF</i> | DUF2527 domain-containing protein                        | DA68059 (c.106::IS1); DA69427 (R19P)                                                                                                                                                                                                                                                                                  | Undetermined                          |
| <i>yphG</i> | UF5107 domain-containing protein                         | DA69427 (L750=); DA69428 (L750=)<br>DA70121 (L750=); DA70122 (L750=)<br>DA70133 (L750=); DA70134 (L750=)                                                                                                                                                                                                              | Undetermined                          |



## References:

1. Madan, R., Kolter, R. & Mahadevan, S. Mutations that activate the silent *bgl* operon of *Escherichia coli* confer a growth advantage in stationary phase. *J Bacteriol* **187**, 7912–7917 (2005).
2. Gu, Y. *et al.* Development of Resistance in *Escherichia coli* ATCC25922 under Exposure of Sub-Inhibitory Concentration of Olaquinox. *Antibiotics (Basel)* **9**, E791 (2020).
3. Lomovskaya, O., Lewis, K. & Matin, A. EmrR is a negative regulator of the *Escherichia coli* multidrug resistance pump EmrAB. *J Bacteriol* **177**, 2328–2334 (1995).
4. Adler, M., Anjum, M., Andersson, D. I. & Sandegren, L. Combinations of mutations in *envZ*, *ftsI*, *mrda*, *acrB* and *acrR* can cause high-level carbapenem resistance in *Escherichia coli*. *J Antimicrob Chemother* **71**, 1188–1198 (2016).
5. Jordan, J. A., Lenski, R. E. & Card, K. J. Idiosyncratic Fitness Costs of Ampicillin-Resistant Mutants Derived from a Long-Term Experiment with *Escherichia coli*. *Antibiotics (Basel)* **11**, 347 (2022).
6. Knöppel, A. *et al.* Genetic Adaptation to Growth Under Laboratory Conditions in *Escherichia coli* and *Salmonella enterica*. *Front Microbiol* **9**, 756 (2018).
7. Fu, Z. *et al.* Prevalence of Fosfomycin Resistance and Mutations in *murA*, *glpT*, and *uhpT* in Methicillin-Resistant *Staphylococcus aureus* Strains Isolated from Blood and Cerebrospinal Fluid Samples. *Front Microbiol* **6**, 1544 (2015).
8. Lee, J. K., Lee, Y. S., Park, Y. K. & Kim, B. S. Mutations in the *gyrA* and *parC* genes in ciprofloxacin-resistant clinical isolates of *Acinetobacter baumannii* in Korea. *Microbiol Immunol* **49**, 647–653 (2005).
9. Feng, X. *et al.* Mutations in *gyrB* play an important role in ciprofloxacin-resistant *Pseudomonas aeruginosa*. *Infect Drug Resist* **12**, 261–272 (2019).
10. Gensberg, K., Jin, Y. F. & Piddock, L. J. A novel *gyrB* mutation in a fluoroquinolone-resistant clinical isolate of *Salmonella typhimurium*. *FEMS Microbiol Lett* **132**, 57–60 (1995).
11. Bohnert, J. A., Schuster, S., Fähnrich, E., Trittler, R. & Kern, W. V. Altered spectrum of multidrug resistance associated with a single point mutation in the *Escherichia coli* RND-type MDR efflux pump YhiV (MdtF). *J Antimicrob Chemother* **59**, 1216–1222 (2007).
12. Rani, A. *et al.* Abundance of Multidrug Resistance Efflux Pumps in the Urinary Metagenome of Kidney Transplant Patients. *Biomed Res Int* **2020**, 5421269 (2020).
13. Wan, Y. *et al.* Alterations in chromosomal genes *nfsA*, *nfsB*, and *ribE* are associated with nitrofurantoin resistance in *Escherichia coli* from the United Kingdom. *Microb Genom* **7**, (2021).
14. Silver, L. L. Fosfomycin: Mechanism and Resistance. *Cold Spring Harb Perspect Med* **7**, a025262 (2017).
15. Lee, Y. H. & Helmann, J. D. Mutations in the primary sigma factor  $\sigma^A$  and termination factor rho that reduce susceptibility to cell wall antibiotics. *J Bacteriol* **196**, 3700–3711 (2014).
16. Apjok, G. *et al.* Limited Evolutionary Conservation of the Phenotypic Effects of Antibiotic Resistance Mutations. *Mol Biol Evol* **36**, 1601–1611 (2019).
17. Pinheiro, F., Warsi, O., Andersson, D. I. & Lässig, M. Metabolic fitness landscapes predict the evolution of antibiotic resistance. *Nat Ecol Evol* **5**, 677–687 (2021).
18. Silver, L. L. Fosfomycin: Mechanism and Resistance. *Cold Spring Harb Perspect Med* **7**, a025262 (2017).
19. Hingley-Wilson, S. M. *et al.* Loss of phenotypic inheritance associated with *ydcl* mutation leads to increased frequency of small, slow persisters in *Escherichia coli*. *Proc Natl Acad Sci U S A* **117**, 4152–4157 (2020).

**Supplementary table 4:** Cross-resistance tested for subset of mutants selected on tetracycline and nitrofurantoin

| Isolate | Genotype                                                                                                                                                               | Selection        | Cross-resistance tested on |      |     |       |
|---------|------------------------------------------------------------------------------------------------------------------------------------------------------------------------|------------------|----------------------------|------|-----|-------|
|         |                                                                                                                                                                        |                  | FOS                        | TET  | NIT | CIP   |
| DA5438  | -                                                                                                                                                                      | -                | 0.38                       | 1.5  | 4   | 0.012 |
| DA67604 | <i>envZ</i> (P148S); <i>rho</i> (S84C); <i>fimE</i> (c.501::IS1)                                                                                                       | TET (1/4x MIC)   | 1                          |      | 8   | 0.38  |
| DA68067 | <i>uhpT</i> (A335-G427del); <i>relA</i> (A274-G727); <i>nfsA</i> (c.674::IS30); <i>yeaR</i> (c.115::IS186)                                                             | NIT (1/4x MIC)   | 128                        | 1.5  |     | 0.008 |
| DA68068 | <i>uhpT</i> (A335-G427del); <i>relA</i> (A274-G727); <i>nfsA</i> (c.674::IS30); <i>yeaR</i> (c.115::IS186); <i>yfaS</i> (R30I)                                         | NIT (1/4x MIC)   | 64                         | 1    |     | 0.016 |
| DA68070 | <i>uhpT</i> (A335-G427del); <i>relA</i> (A274-G727); <i>nfsA</i> (c.674::IS30); <i>yeaR</i> (c.115::IS186)                                                             | NIT (1/4x MIC)   | 64                         | 1.5  |     | 0.012 |
| DA68071 | <i>uhpT</i> (A335-G427del); <i>relA</i> (A274-G727); <i>nfsA</i> (c.674::IS30)                                                                                         | NIT (1/4x MIC)   | 48                         | 0.75 |     | 0.012 |
| DA68076 | <i>uhpT</i> (A335-G427del); <i>relA</i> (A274-G727); <i>nfsA</i> (c.674::IS30); <i>yeaR</i> (c.115::IS186)                                                             | NIT (1/4x MIC)   | 32-64                      | 1    |     | 0.012 |
| DA68060 | <i>ptwF</i> (R1=); <i>putP</i> (V338L); <i>aat</i> (c.125::IS1); $\Delta$ <i>yrdA-yrdD</i> (562bp); <i>kdpD</i> (A426V); <i>rpH</i> (A203-R230del); <i>fimE</i> (H73P) | NIT (1/200x MIC) | 0.75                       | 1    |     | 0.006 |
| DA68063 | <i>nfsA</i> (c.380::IS186); <i>ptwF</i> (R1=); <i>putP</i> (V338L); <i>aat</i> (c.125::IS1); <i>kdpD</i> (A426V); <i>rpH</i> (A203-R230del); <i>fimE</i> (H73P)        | NIT (1/200x MIC) | 1.5                        | 1.5  |     | 0.008 |
